# Supplementary material
Source: Springer Nature journal article supplement (https://www.springermedizin.de/resource/supplementary/12906_2013_1525_MOESM4_ESM.pdf/9522158)

**(a)**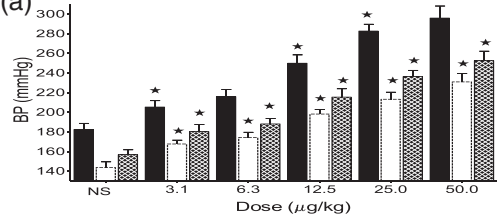**(b)**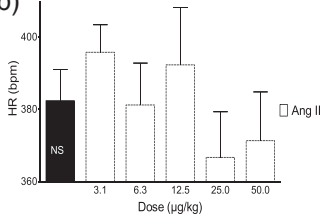

Supplement: MOESM4 [file 9522158]
